# Supplementary material for: Combined In Silico and In Vitro Analyses to Assess the Anticancer Potential of Thiazolidinedione–Thiosemicarbazone Hybrid Molecules
Source: MDPI journal article supplement (doi:10.3390/ijms242417521), 2023-12-15
Supplement: s1 [file s1]

# Combined *in silico* and *in vitro* analyses to assess the anti-cancer potential of thiazolidinedione-thiosemicarbazone hybrid molecules

Agata Paneth<sup>1</sup>, Barbara Kaproń<sup>2</sup>, Tomasz Plech<sup>3</sup>, Roman Paduch<sup>4</sup>, Nazar Trotsko<sup>1\*</sup>, and Piotr Paneth<sup>5\*</sup>

<sup>1</sup> Chair and Department of Organic Chemistry, Faculty of Pharmacy, Medical University of Lublin, Lublin, Poland

<sup>2</sup> Department of Clinical Genetics, *Faculty of Medicine*, Medical University of Lublin, Lublin, Poland

<sup>3</sup> Department of Pharmacology, *Faculty of Health Sciences*, Medical University of Lublin, Lublin, Poland

<sup>4</sup> Department of Virology and Immunology, Institute of Biological Sciences, Faculty of Biology and Biotechnology, Maria Curie-Skłodowska University, Lublin, Poland

<sup>5</sup> Institute of Applied Radiation Chemistry, Faculty of Chemistry, Lodz University of Technology, Poland

\* Correspondence: piotr.paneth@p.lodz.pl (P.P.) and nazar.trotsko@umlub.pl (N.T.)

## Supplementary Materials

**Table S1.** DPPH free radical scavenging activity and Ferric-reducing antioxidant power (FRAP) of TZD-TSCs **2-5**.....

3

**Figure S1.**  $^1\text{H}$  NMR spectra for **2**.....

4

**Figure S2.**  $^{13}\text{C}$  NMR spectra for **2**.....

5

**Figure S3.**  $^1\text{H}$  NMR spectra for **3**.....

6

**Figure S4.**  $^{13}\text{C}$  NMR spectra for **3**.....

7

**Figure S5.**  $^1\text{H}$  NMR spectra for **4**.....

8

**Figure S6.**  $^{13}\text{C}$  NMR spectra for **4**.....

9

**Figure S7.**  $^1\text{H}$  NMR spectra for **5**.....

10

**Figure S8.**  $^{13}\text{C}$  NMR spectra for **5**.....

11

**Table S1.** DPPH free radical scavenging activity and Ferric-reducing antioxidant power (FRAP) of TZD-TSCs 2-5.

| Samples                                                                                                                           | Concentration [ $\mu\text{g/mL}$ ] |                   |                    |                    |
|-----------------------------------------------------------------------------------------------------------------------------------|------------------------------------|-------------------|--------------------|--------------------|
|                                                                                                                                   | 25                                 | 75                | 150                | 200                |
| <b>DPPH assay (reduction values corresponding to the appropriate concentration of Trolox, <math>\mu\text{g/mL}</math>)</b>        |                                    |                   |                    |                    |
| 2                                                                                                                                 | 2.942 $\pm$ 1.587                  | 6.670 $\pm$ 0.205 | 11.412 $\pm$ 0.358 | 15.068 $\pm$ 0.307 |
| 3                                                                                                                                 | 2.616 $\pm$ 0.102                  | 9.168 $\pm$ 0.358 | 17.167 $\pm$ 0.410 | 21.439 $\pm$ 0.410 |
| 4                                                                                                                                 | 2.834 $\pm$ 0.717                  | 6.381 $\pm$ 0.410 | 13.982 $\pm$ 0.717 | 17.638 $\pm$ 0.256 |
| 5                                                                                                                                 | 0.768 $\pm$ 0.191                  | 2.689 $\pm$ 0.307 | 9.964 $\pm$ 0.358  | 15.177 $\pm$ 0.051 |
| <b>FRAP assay (reduction values corresponding to the appropriate concentration of ascorbic acid, <math>\mu\text{g/mL}</math>)</b> |                                    |                   |                    |                    |
| TZD-TSC 2                                                                                                                         | 2.43 $\pm$ 0.54                    | 4.32 $\pm$ 1.62   | 3.51 $\pm$ 0.24    | 7.84 $\pm$ 2.43    |
| TZD-TSC 3                                                                                                                         | 0.81 $\pm$ 0.72                    | 0.27 $\pm$ 0.21   | 1.08 $\pm$ 0.72    | 1.89 $\pm$ 0.72    |
| TZD-TSC 4                                                                                                                         | 1.62 $\pm$ 0.81                    | 5.95 $\pm$ 2.30   | 4.05 $\pm$ 0.54    | 5.41 $\pm$ 0.90    |
| TZD-TSC 5                                                                                                                         | 2.70 $\pm$ 0.90                    | 2.43 $\pm$ 0.81   | 4.59 $\pm$ 0.54    | 9.19 $\pm$ 4.32    |

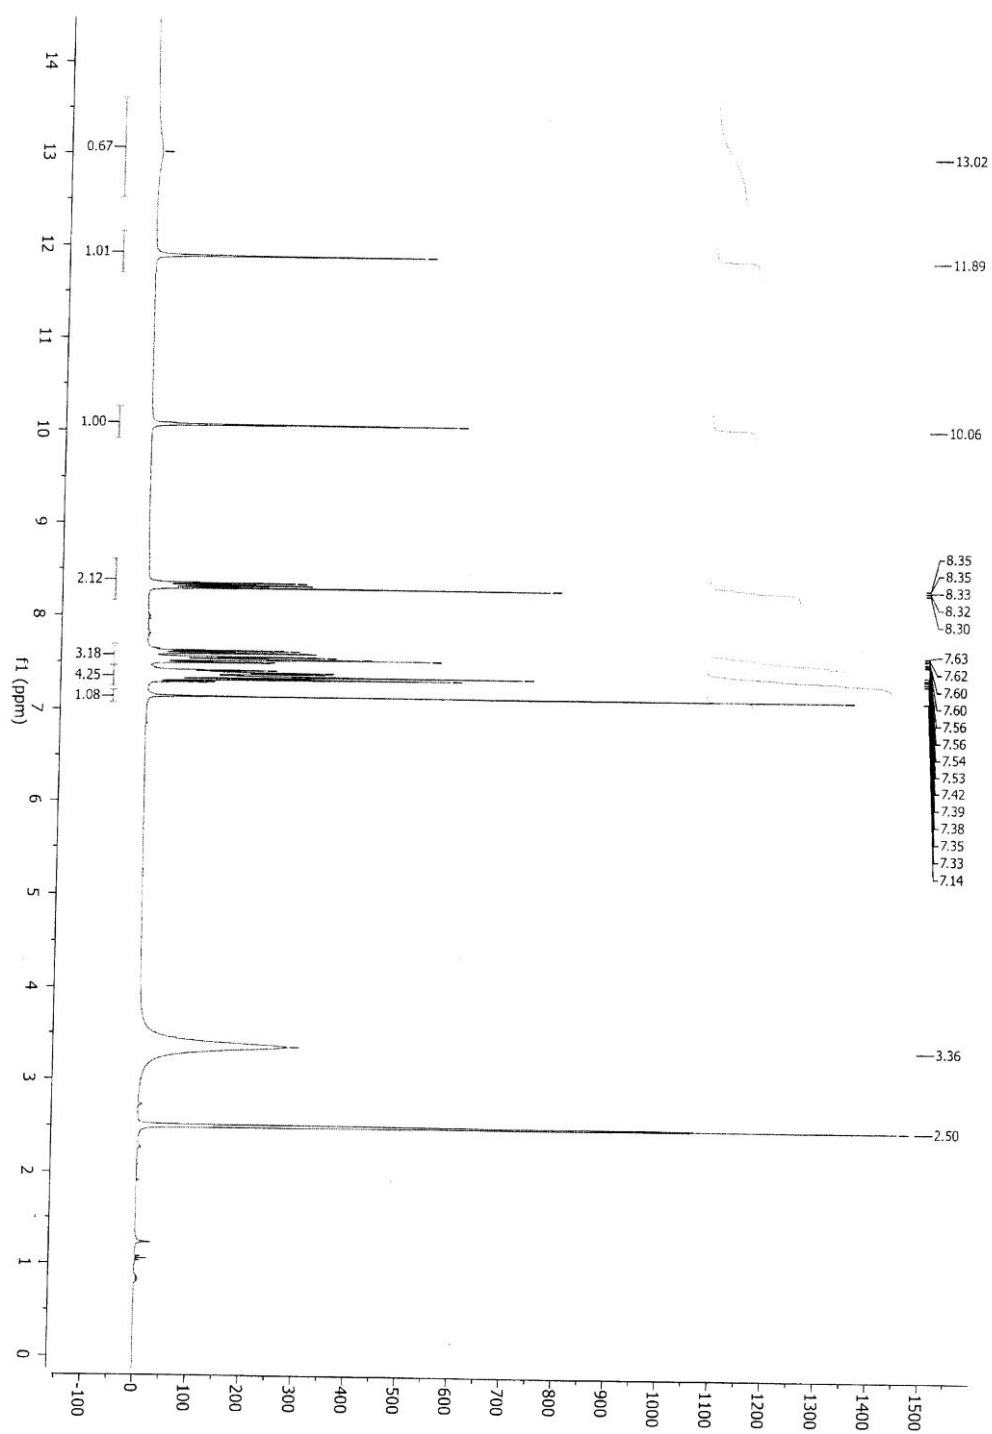

Figure S1. <sup>1</sup>H NMR spectra for 2

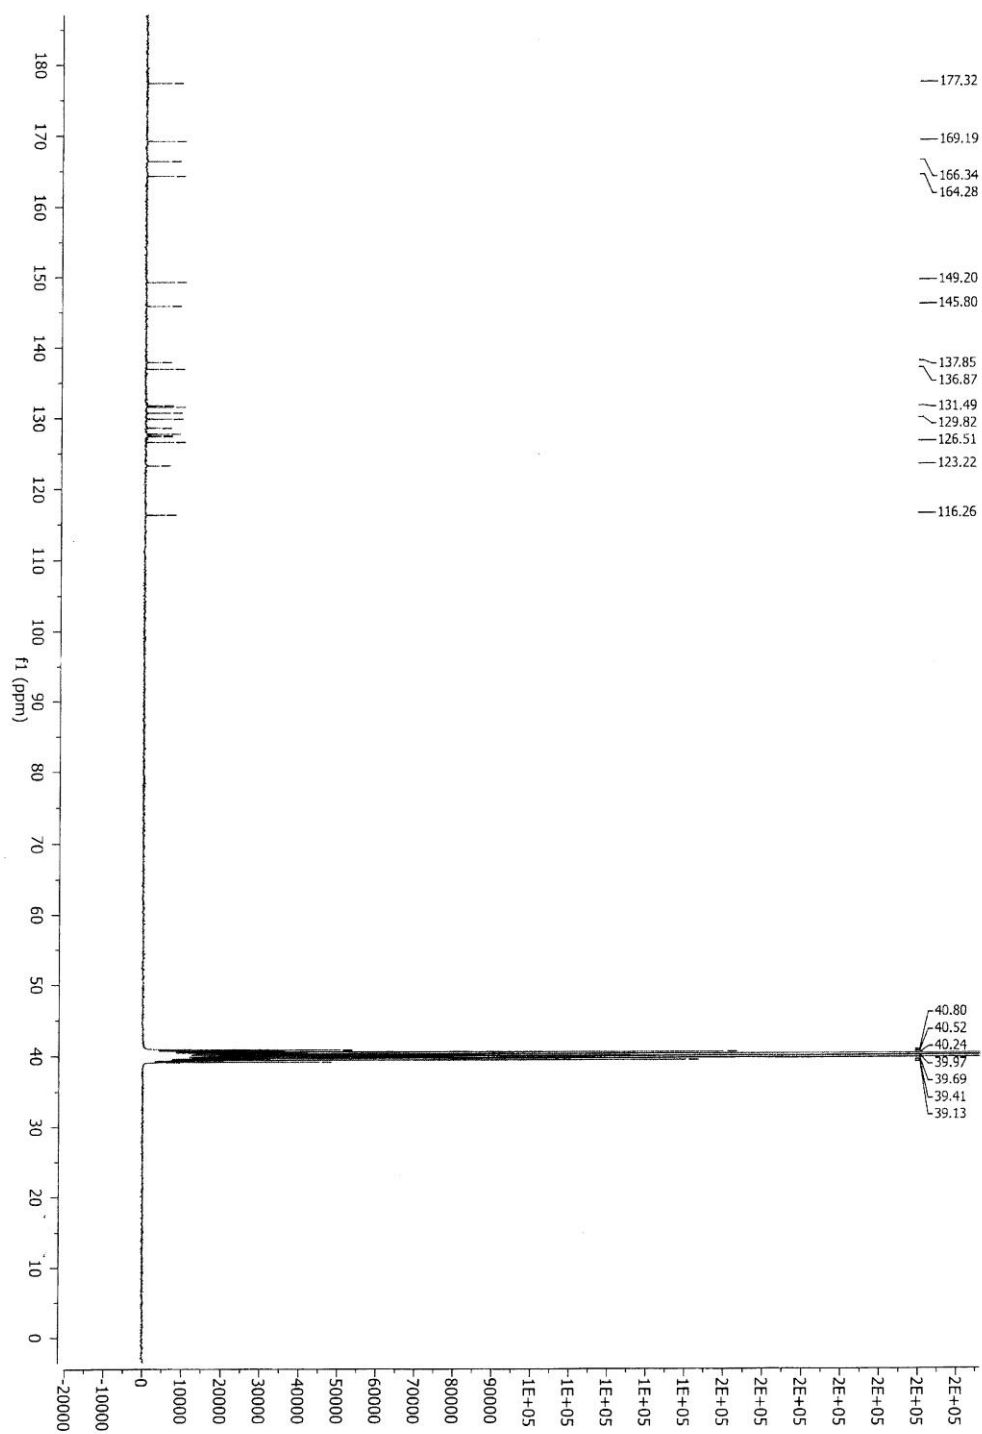

Figure S2.  $^{13}\text{C}$  NMR spectra for 2

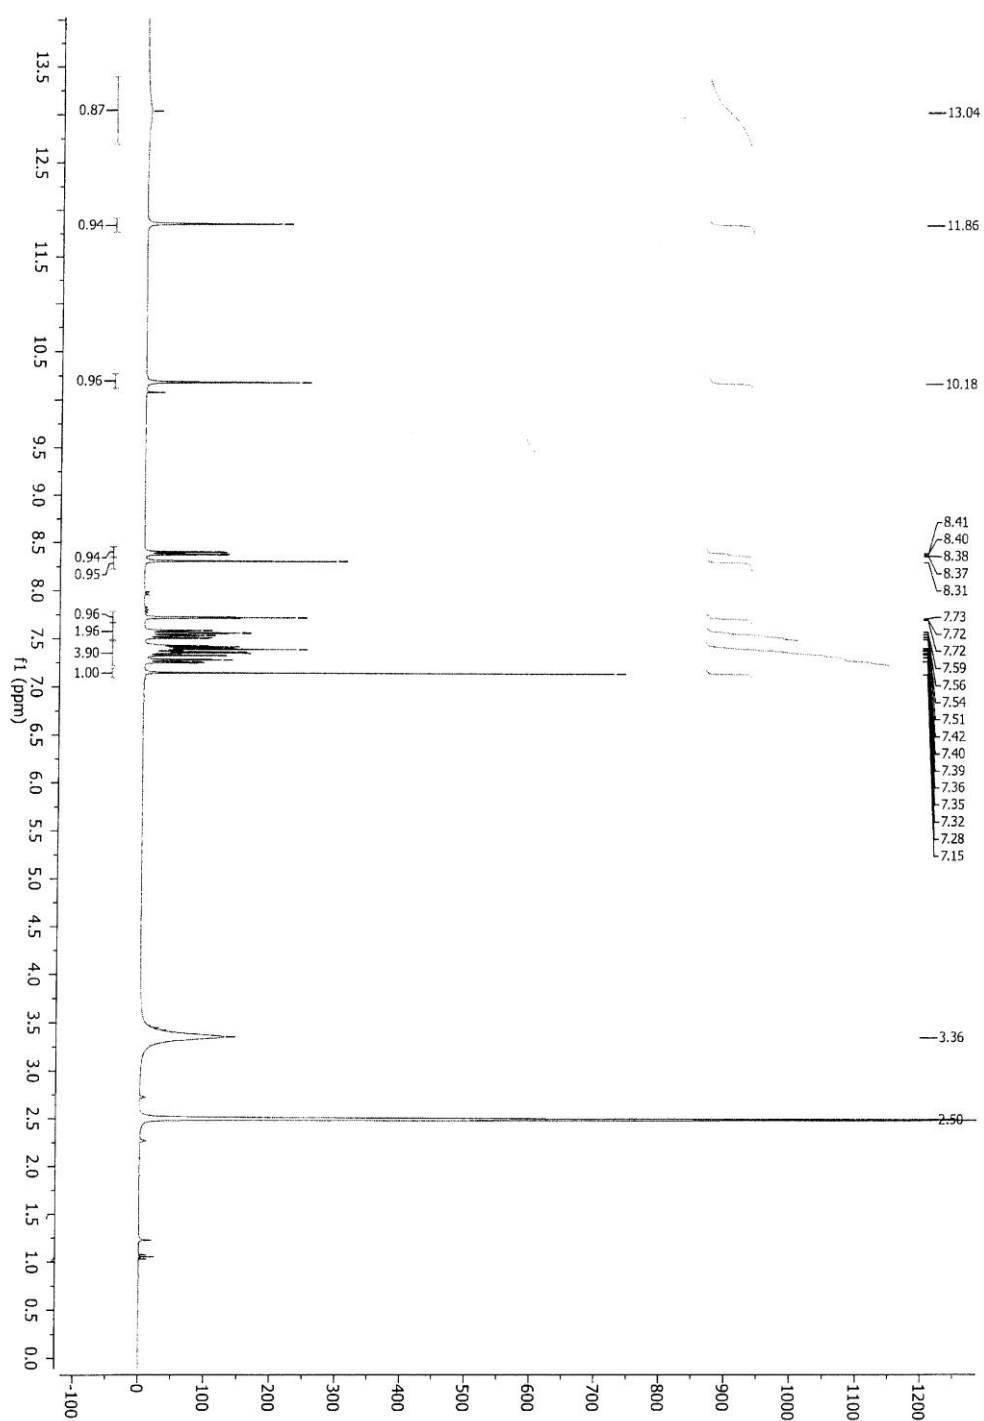

Figure S3.  $^1\text{H}$  NMR spectra for 3

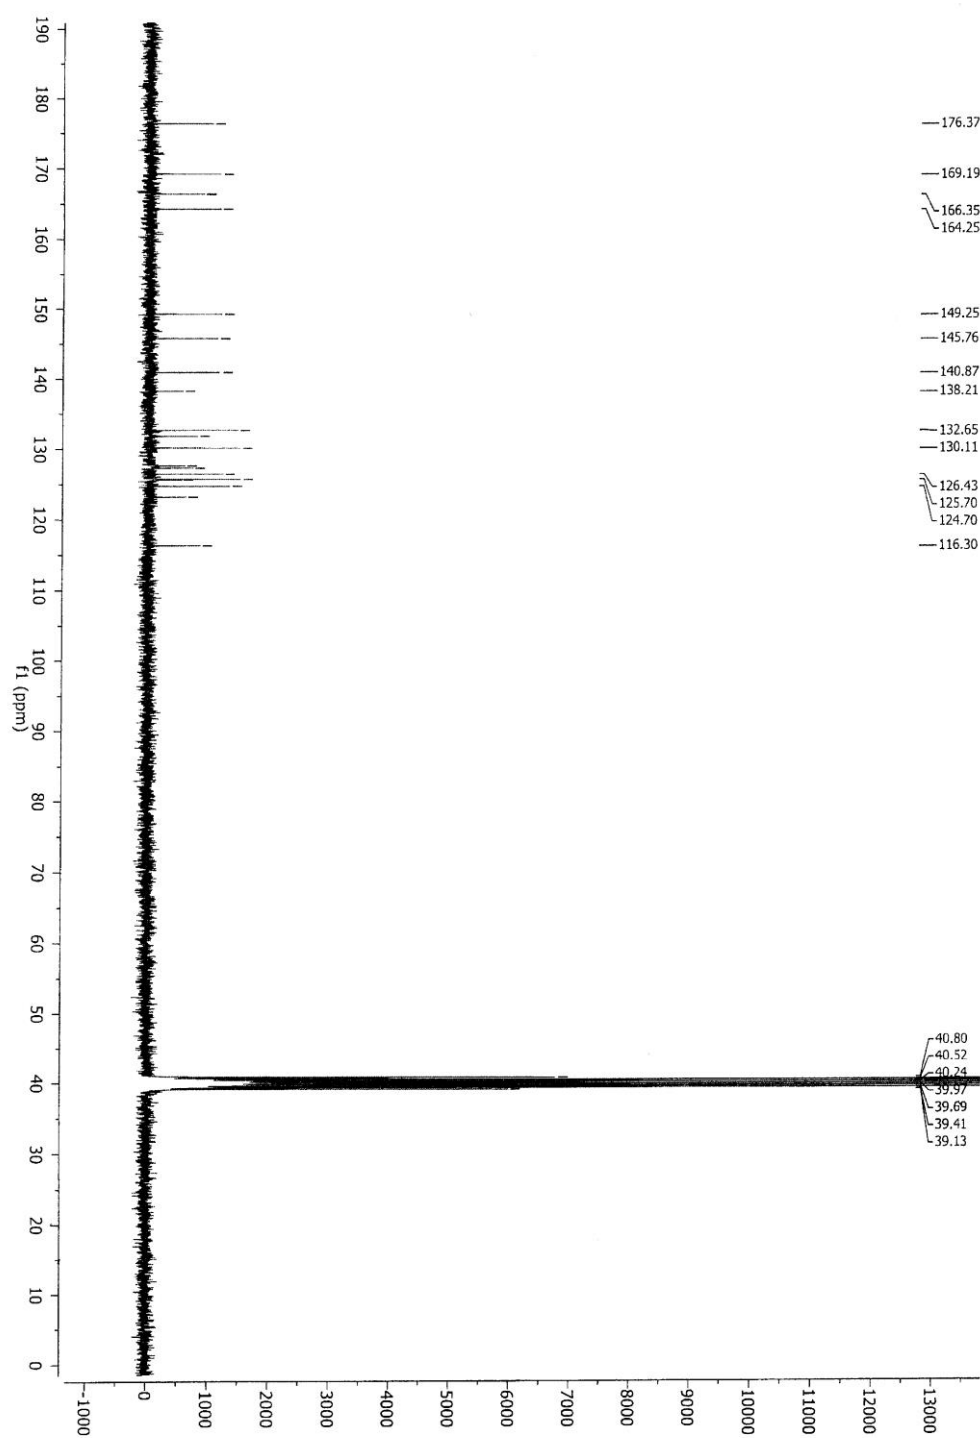

Figure S4. <sup>13</sup>C NMR spectra for 3

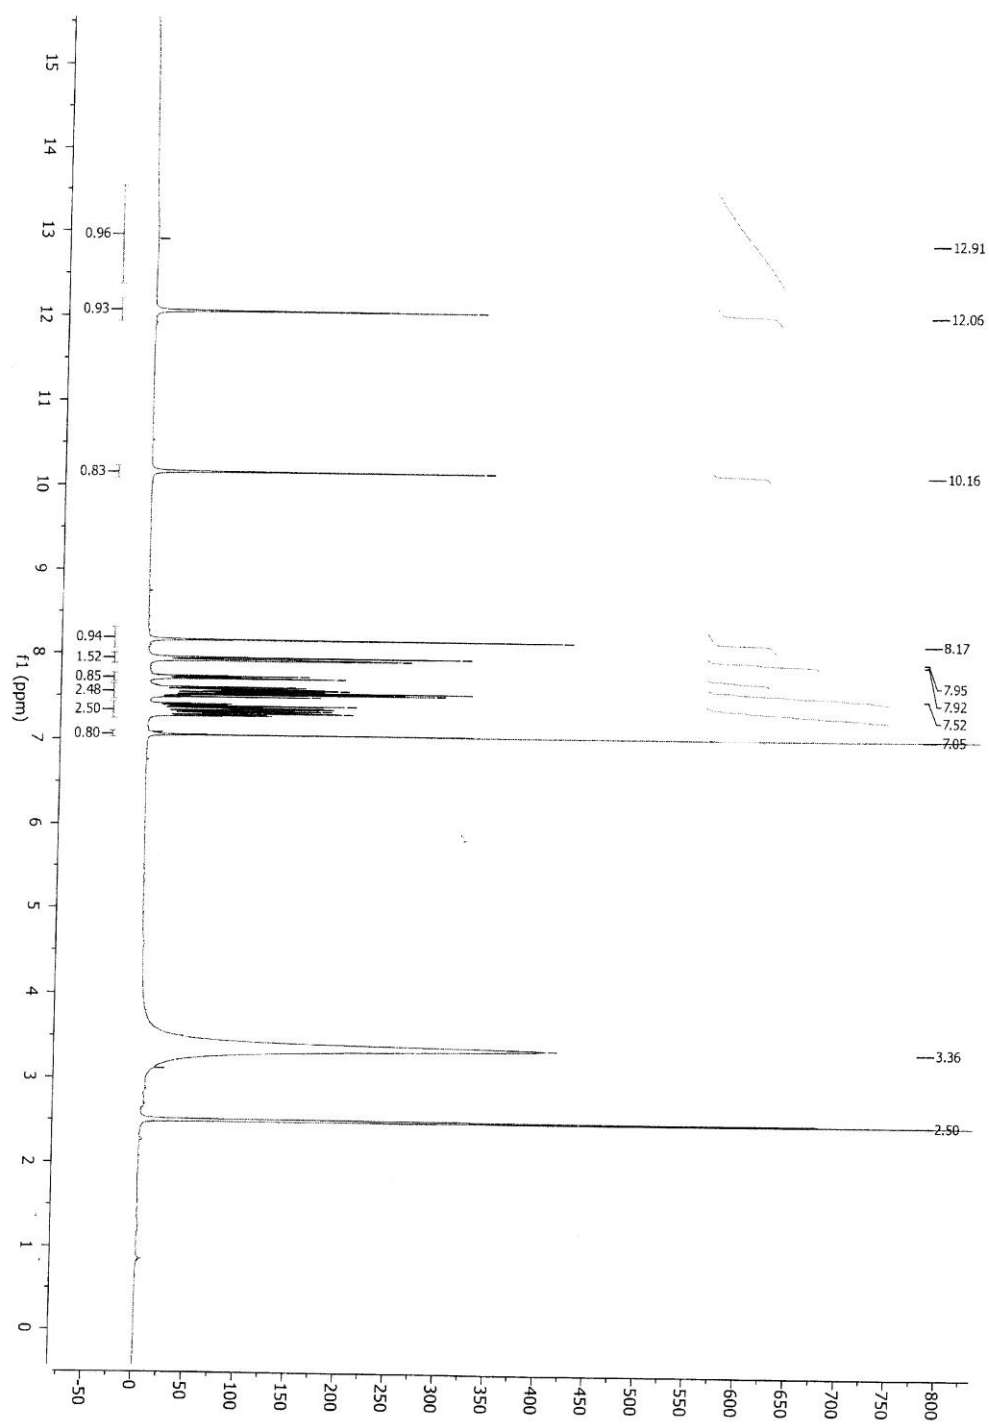

Figure S5.  $^1\text{H}$  NMR spectra for **4**



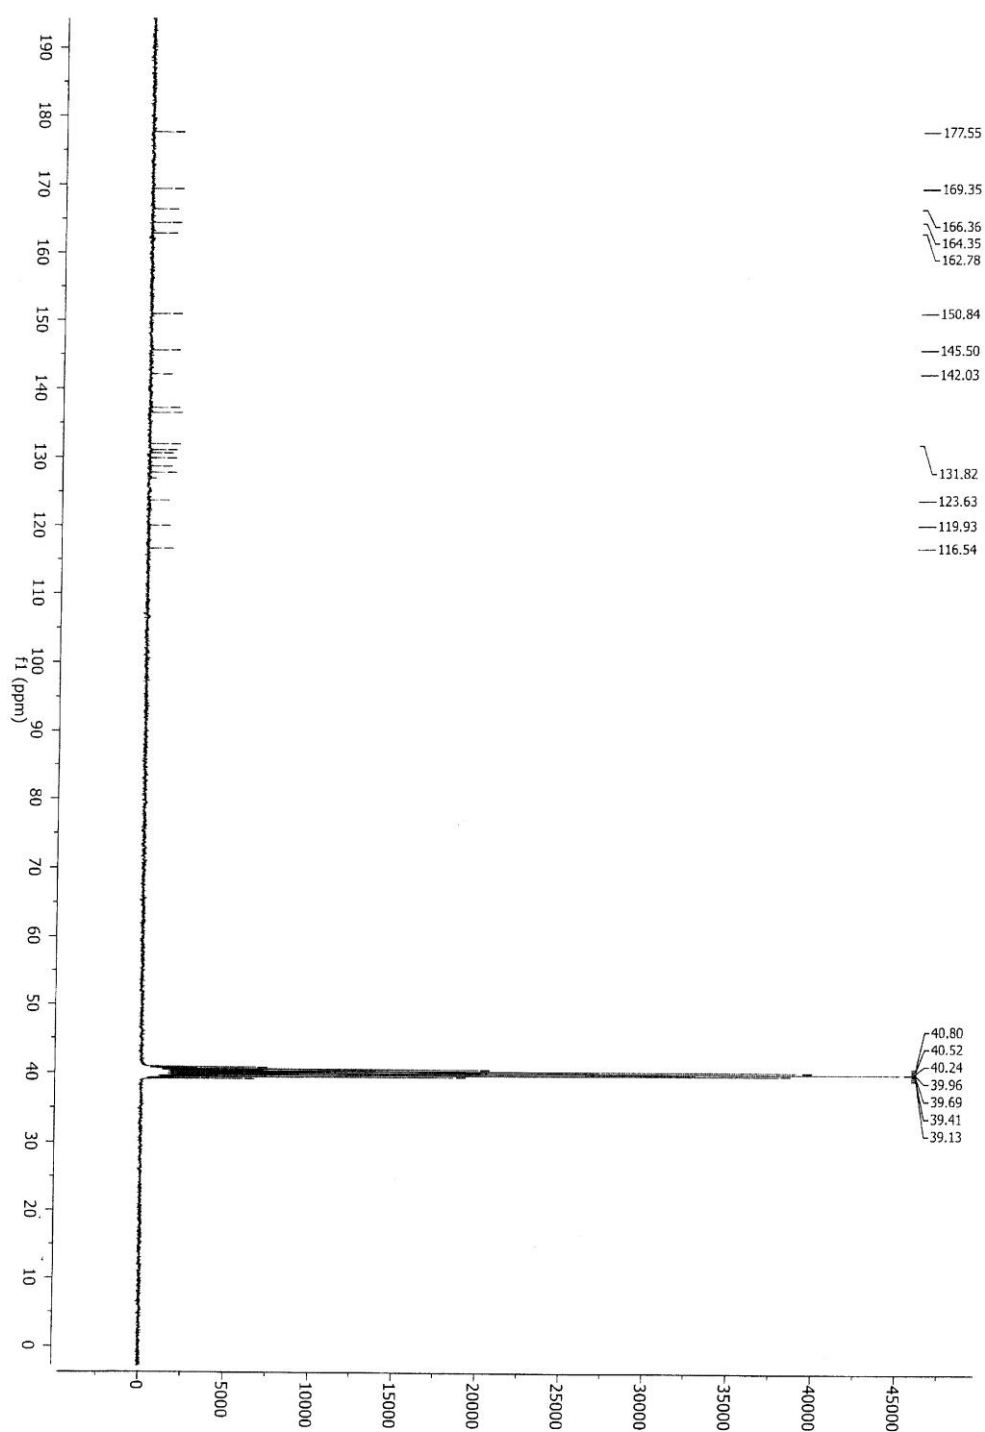

Figure S6. <sup>13</sup>C NMR spectra for 4

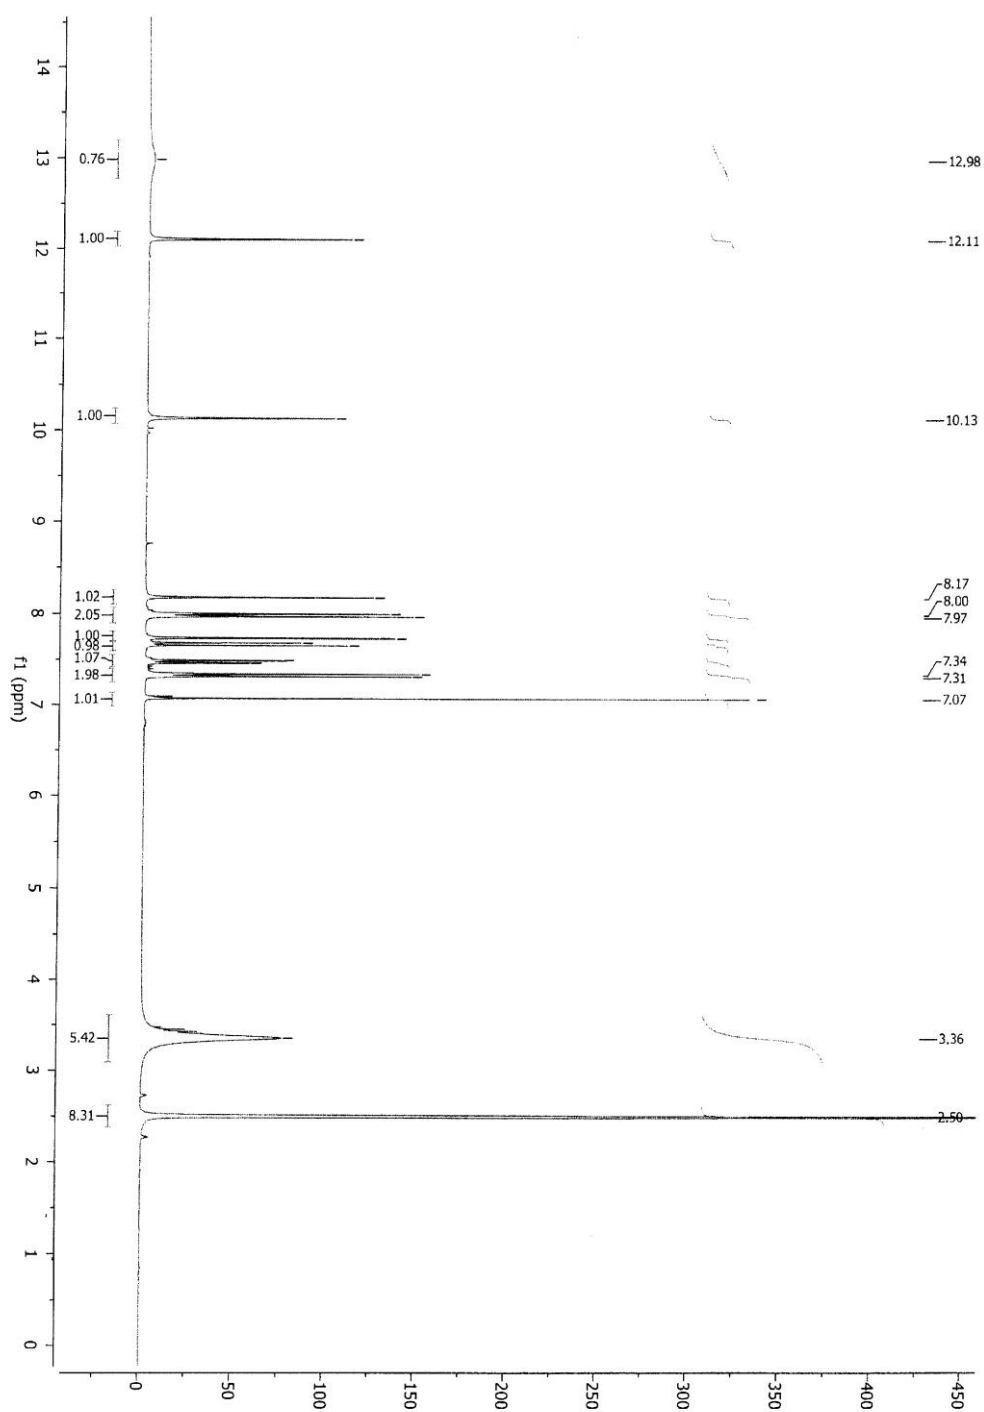

Figure S7.  $^1\text{H}$  NMR spectra for 5

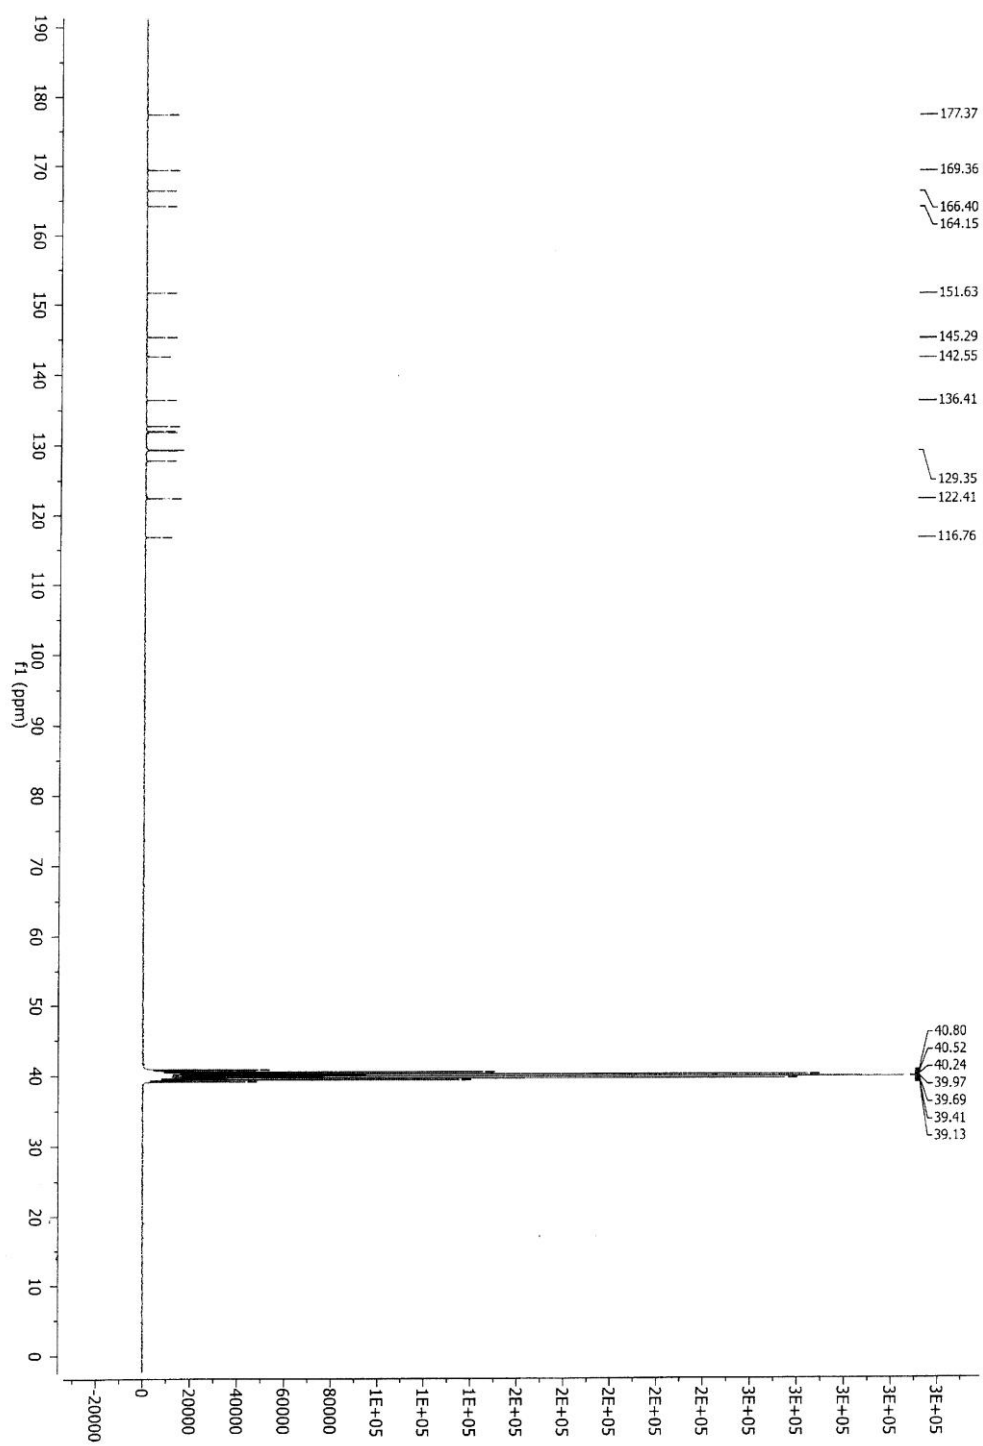

Figure S8. <sup>13</sup>C NMR spectra for 5
